# Supplementary material for: Selective colorimetric sensing of Fe3+ by hesperetin-conjugated silver nanoparticles: further investigation of interaction properties with bovine serum albumin
Source: Royal Society of Chemistry journal article supplement (doi:10.1039/d5ra09319h), 2026-04-07
Supplement: d5ra09319h1.pdf [file d5ra09319h1.pdf]

## **Supplementary Material**

### **Selective Colorimetric Sensing of Fe<sup>3+</sup> by Hesperetin-Conjugated Silver Nanoparticles: Further Investigation of Interaction Properties with Bovine Serum Albumin**

Sushma, Deepti Chauhan and Kalyan Sundar Ghosh\*

*Department of Chemistry, National Institute of Technology Hamirpur, Himachal Pradesh  
177005, India*

**\*Corresponding Author:** KSG: Tel: +91-1972-254104; Fax: +91-1972-223834; e-mail:

[kalyan@nith.ac.in](mailto:kalyan@nith.ac.in)

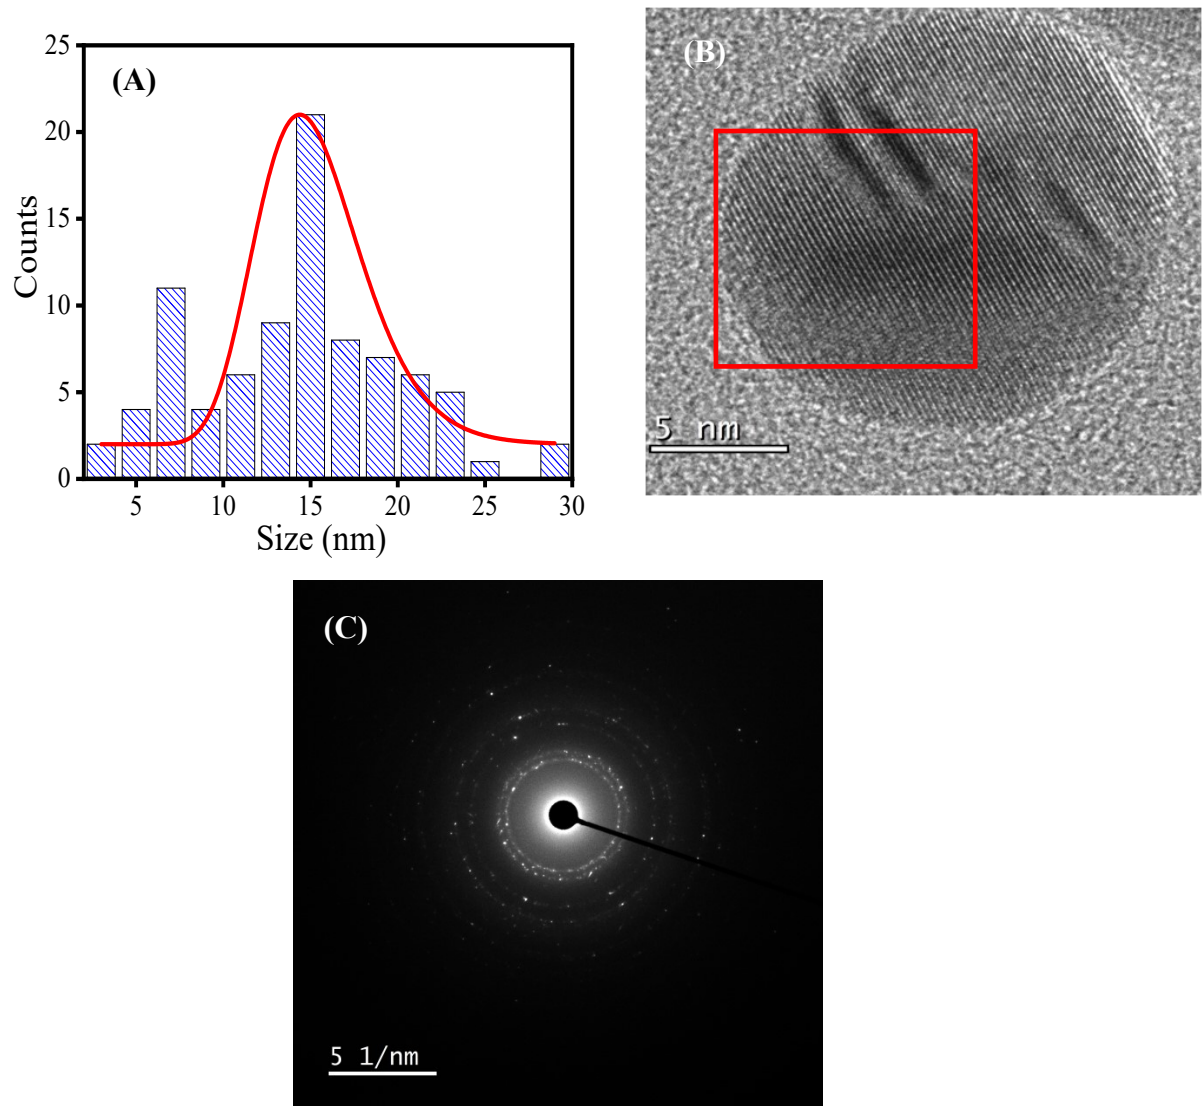

**Fig. S1:** (A) Particle size-distribution histogram; (B) HRTEM micrograph and (C) SAED pattern of HSP-AgNPs.

#### ***Determination of molar concentration of HSP-AgNPs***

Assuming spherical shape of the nanoparticles and complete reduction of silver (I) to silver atoms, the molar concentration of HSP-AgNPs was calculated following the method described by Lewis *et al.* [22].

$$C = \frac{N_{NP}}{N_A (1)}$$

Where  $C$  is the molar concentration of HSP-AgNPs,  $N_{NP}$  is the number of nanoparticles formed per  $1 \times 10^{-3}$  mol of  $\text{AgNO}_3$ ,  $N_A$  is the Avogadro's number. The number of nanoparticles formed per  $1 \times 10^{-3}$  mol of  $\text{AgNO}_3$  can be calculated using equation (2)

$$N_{NP} = \frac{N_{atom}}{N} \quad (2)$$

Where  $N_{atom}$  is the number of silver atoms and  $N$  is the number of silver atoms per nanoparticle.

The average number of silver atoms per nanoparticle ( $N$ ) was calculated using (3)

$$N = \frac{\pi \rho D^3}{6 M} \quad (3)$$

Where  $\rho$  is the density of silver ( $10.49 \text{ g/cm}^3$ ),  $M$  stands for atomic weight of silver ( $108 \text{ g/mol}$ ),  $D$  is the average diameter of silver nanoparticles (in nm).

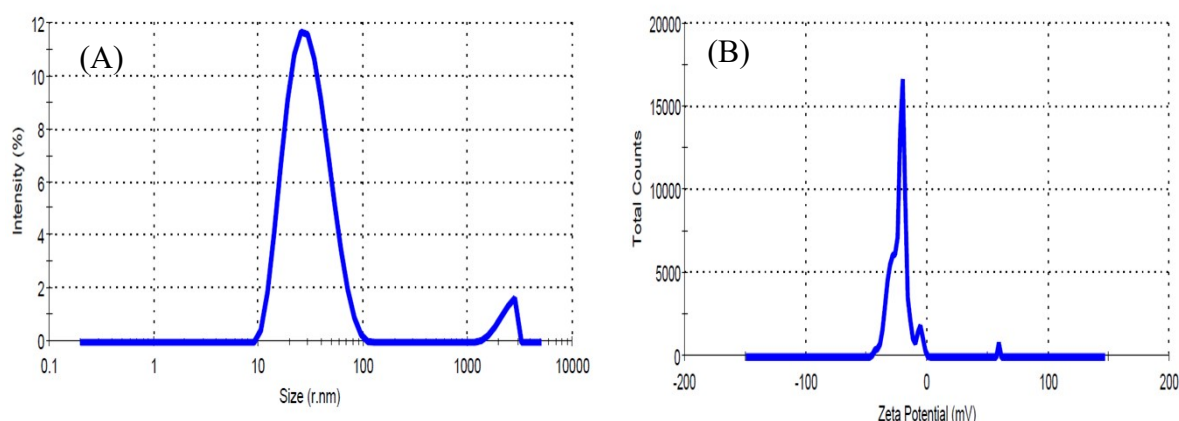

**Fig. S2:** (A) Particle size distribution (obtained from dynamic light scattering) and (B) Zeta potential of HSP-AgNPs.

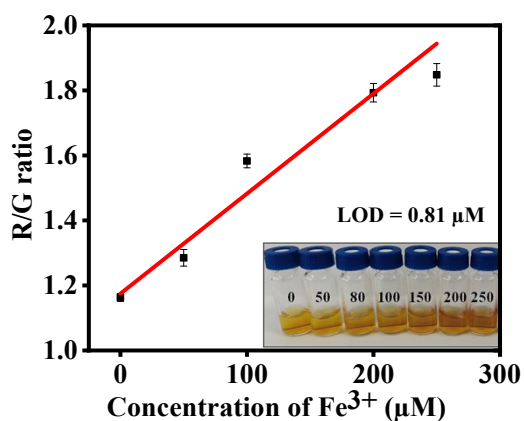

**Fig. S3:** Calibration curves for colorimetric sensing of  $\text{Fe}^{3+}$  by using HSP-AgNPs.

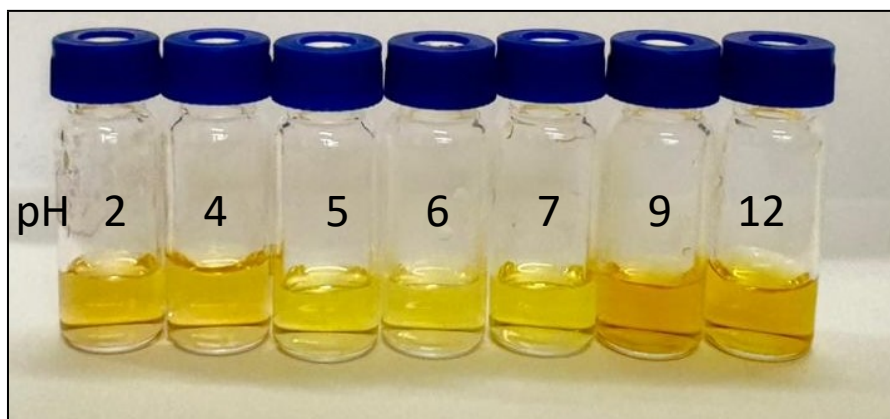

**Fig. S4:** The color of HSP-AgNPs at different pH.
